# Supplementary material for: The human gut symbiont Ruminococcus gnavus shows specificity to blood group A antigen during mucin glycan foraging: Implication for niche colonisation in the gastrointestinal tract
Source: PLoS Biol. 2021 Dec 22;19(12):e3001498. doi: 10.1371/journal.pbio.3001498 (PMC8730463; doi:10.1371/journal.pbio.3001498)
Supplement: S2 Table — BgA II, blood group A tetrasaccharide type II; BgH, blood group H trisaccharide; ITC, isothermal titration calorimetry. (XLSX) [file pbio.3001498.s002.xlsx]

## Sheet: Sheet1
	UEA1	RgGH98
Kd (µM)	10.3 ± 0.01	490.3 ± 48.3
ΔH (kcal/mol)	-18.0 ± 0.2	1.1 ± 0.2
ΔS (kcal/K/mol)	3.7 10-2 ± 7.1 10-4	1.9 10-2 ± 4.1 10-4
ΔG (kcal/mol)	-6.8 ± 0.01	-4.5 ± 0.1
N (sites)	1.28 ± 0.04	1*
*N was manually set to 1.
